# Supplementary material for: Increased biomass production and glycogen accumulation in apcE gene deleted Synechocystis sp. PCC 6803
Source: PubMed Central journal article supplement (PMC4052703; doi:10.1186/s13568-014-0017-z), 2014-03-15
Supplement: s13568-014-0017-z-S1.pdf [file s13568-014-0017-z-S1.pdf]

1 Supplementary Table S1. Primers used in this study.

| Primer Name | Sequence (5'-3')                                |
|-------------|-------------------------------------------------|
| ApcE_up-F   | CGGGCCCCCCTCGAGGGGCATTTCCCACCCCGTTTCA           |
| ApcE_up-R   | ATGAATTGTTTTAGGACGTCTTGGATTTCATTATCTCCCATTAACA  |
| ApcE_down-F | CTCATTITTAGCCATGACGTCGGTTGCGGTTGTTTAAAGCTTAGC   |
| ApcE_down-R | GTGGATCCCCCGGGCTGCAGTGGGCATAATCCTCCAATTGGGCTAGC |
| kanamycin-F | ATAATGAAATCCAAGACGTCCTAAAACAATTCATCCAGTAA       |
| kanamycin-R | AAACAACCGCAACCGACGTCATGGCTAAAATGAGAATATCACCG    |
| ApcE gene-F | ATGAGTGTTAAGGCAAGTGG TGGC                       |
| ApcE gene-R | CTAACCGCCCACTTTTACTACTGGGGTA                    |

2

3

4 **Title:** Increased biomass production and glycogen accumulation in *apcE* gene deleted  
5 *Synechocystis* sp. PCC 6803

6 **Journal name:** AMB express

7 **Authors:** Ancy Joseph, Shimpei Aikawa, Kengo Sasaki, Fumio Matsuda, Tomohisa  
8 Hasunuma, and Akihiko Kondo

9 **Corresponding author:** Akihiko Kondo

10 Affiliation: Department of Chemical Science and Engineering, Graduate School of  
11 Engineering, Kobe University

12 E-mail: akondo@kobe-u.ac.jp
